# Supplementary material for: The role of weak hydrogen bonds in chiral recognition
Source: Royal Society of Chemistry journal article supplement (doi:10.1039/c1cp20987f), 2011-01-01

# The role of weak hydrogen bonds in chiral recognition

Debora Scuderi, Katia Le Barbu-Debus, A. Zehnacker

## Supplementary information

### Figure S1

Comparison between the IRMPD spectra of  $\text{QnH}^+$  (triangles) and its pseudo enantiomer  $\text{QdH}^+$  (squares) in the region of the  $\nu(\text{OH})$  stretch.

### Figure S2

IRMPD spectrum of  $(\text{CdQn})\text{H}^+$  in the 2800-3800  $\text{cm}^{-1}$  energy range.

### Figure S3

Most stable calculated structures of  $(\text{CdQn})\text{H}^+$  obtained at the b3-lyp/6-31+G\* level of the theory.

### Figure S4

Most stable calculated structures of  $(\text{CdQd})\text{H}^+$  obtained at the b3-lyp/6-31+G\* level of the theory.

### Figure S5

IRMPD spectrum of  $(\text{CdQd})\text{H}^+$  in the 2800-3800  $\text{cm}^{-1}$  energy range.

Figure S1

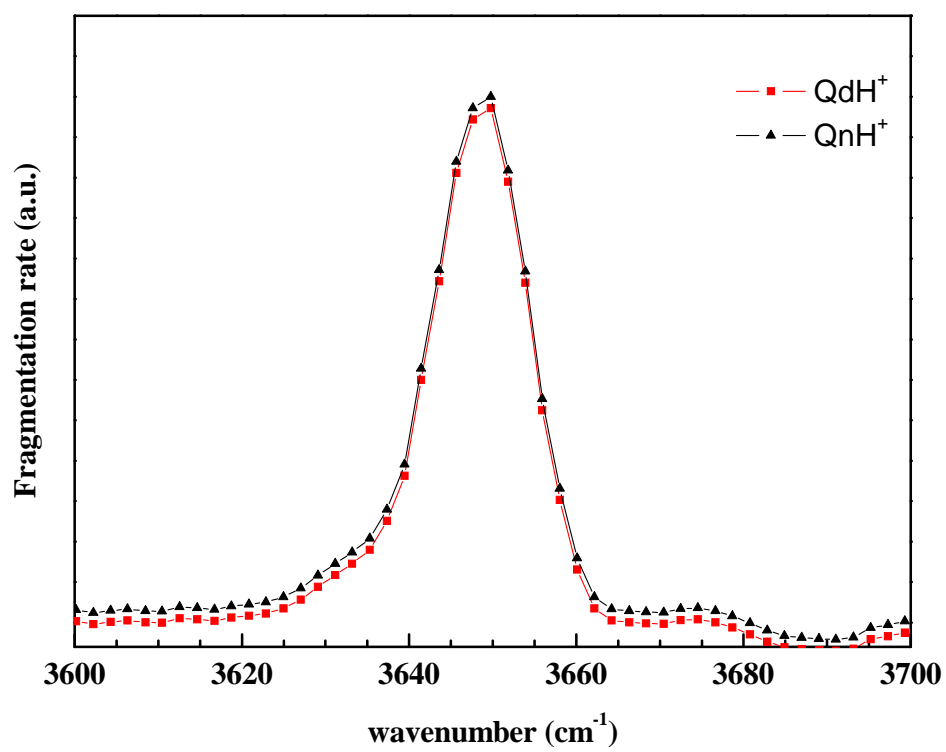

Figure S2

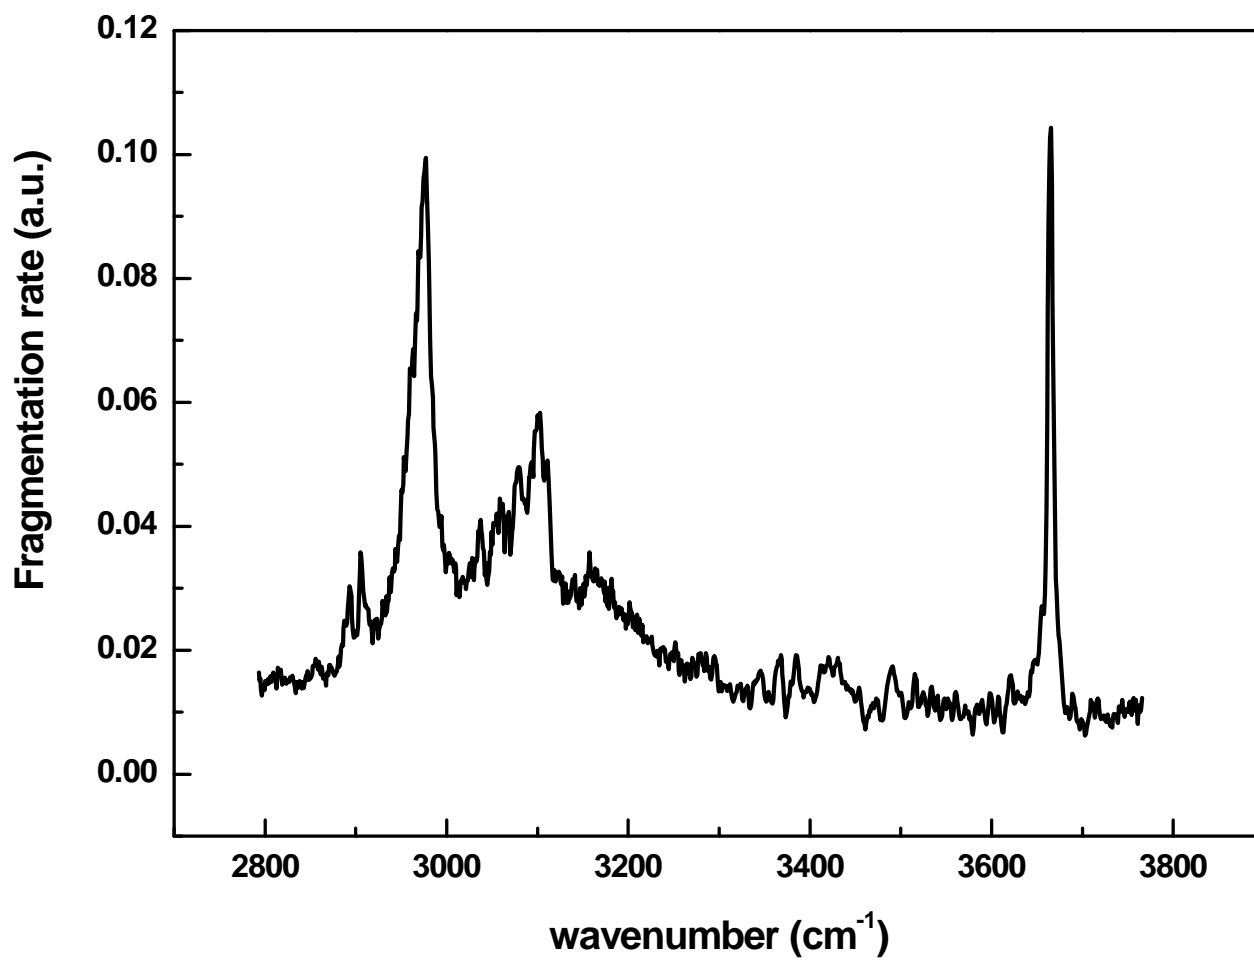

Figure S3

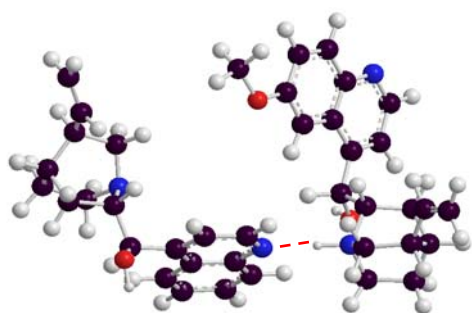

$\text{NH}_I^+ \dots \text{N}_{\text{Iring}}$   
( $\text{Qn H}^+ \text{Cd}$ )

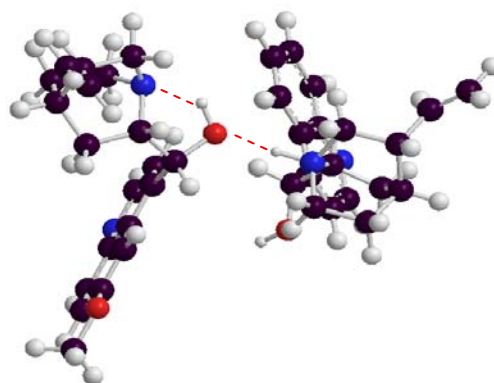

$\text{NH}_I^+ \dots \text{OH}_{\text{II}} \dots \text{N}_{\text{II}}$   
( $\text{Qn CdH}^+$ )

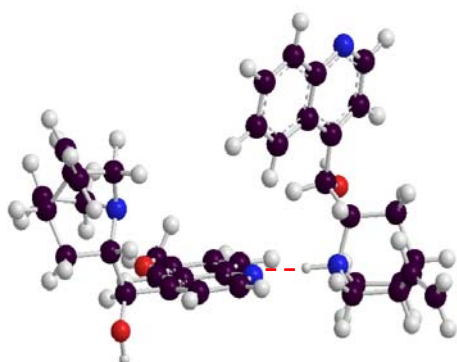

$\text{NH}_I^+ \dots \text{N}_{\text{Iring}}$   
( $\text{Qn CdH}^+$ )

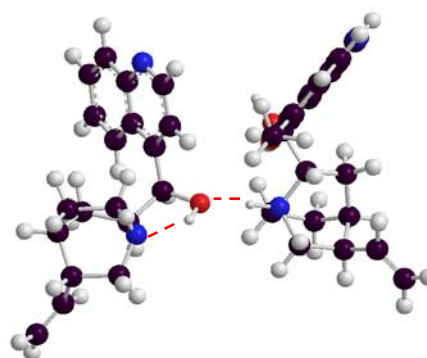

$\text{NH}_I^+ \dots \text{OH}_{\text{II}} \dots \text{N}_{\text{II}}$   
( $\text{Qn H}^+ \text{Cd}$ )

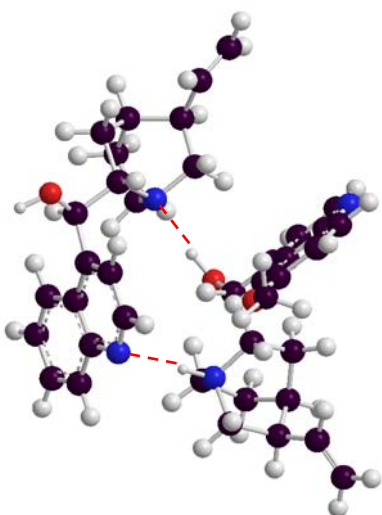

$\text{NH}_I^+ \dots \text{N}_{\text{Iring}} / \text{OH}_I \dots \text{N}_{\text{II}}$   
( $\text{Qn H}^+ \text{Cd}$ )

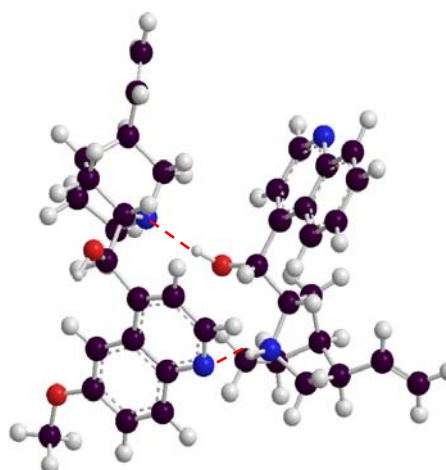

$\text{NH}_I^+ \dots \text{N}_{\text{Iring}} / \text{OH}_I \dots \text{N}_{\text{II}}$   
( $\text{Qn Cd H}^+$ )

Figure S4

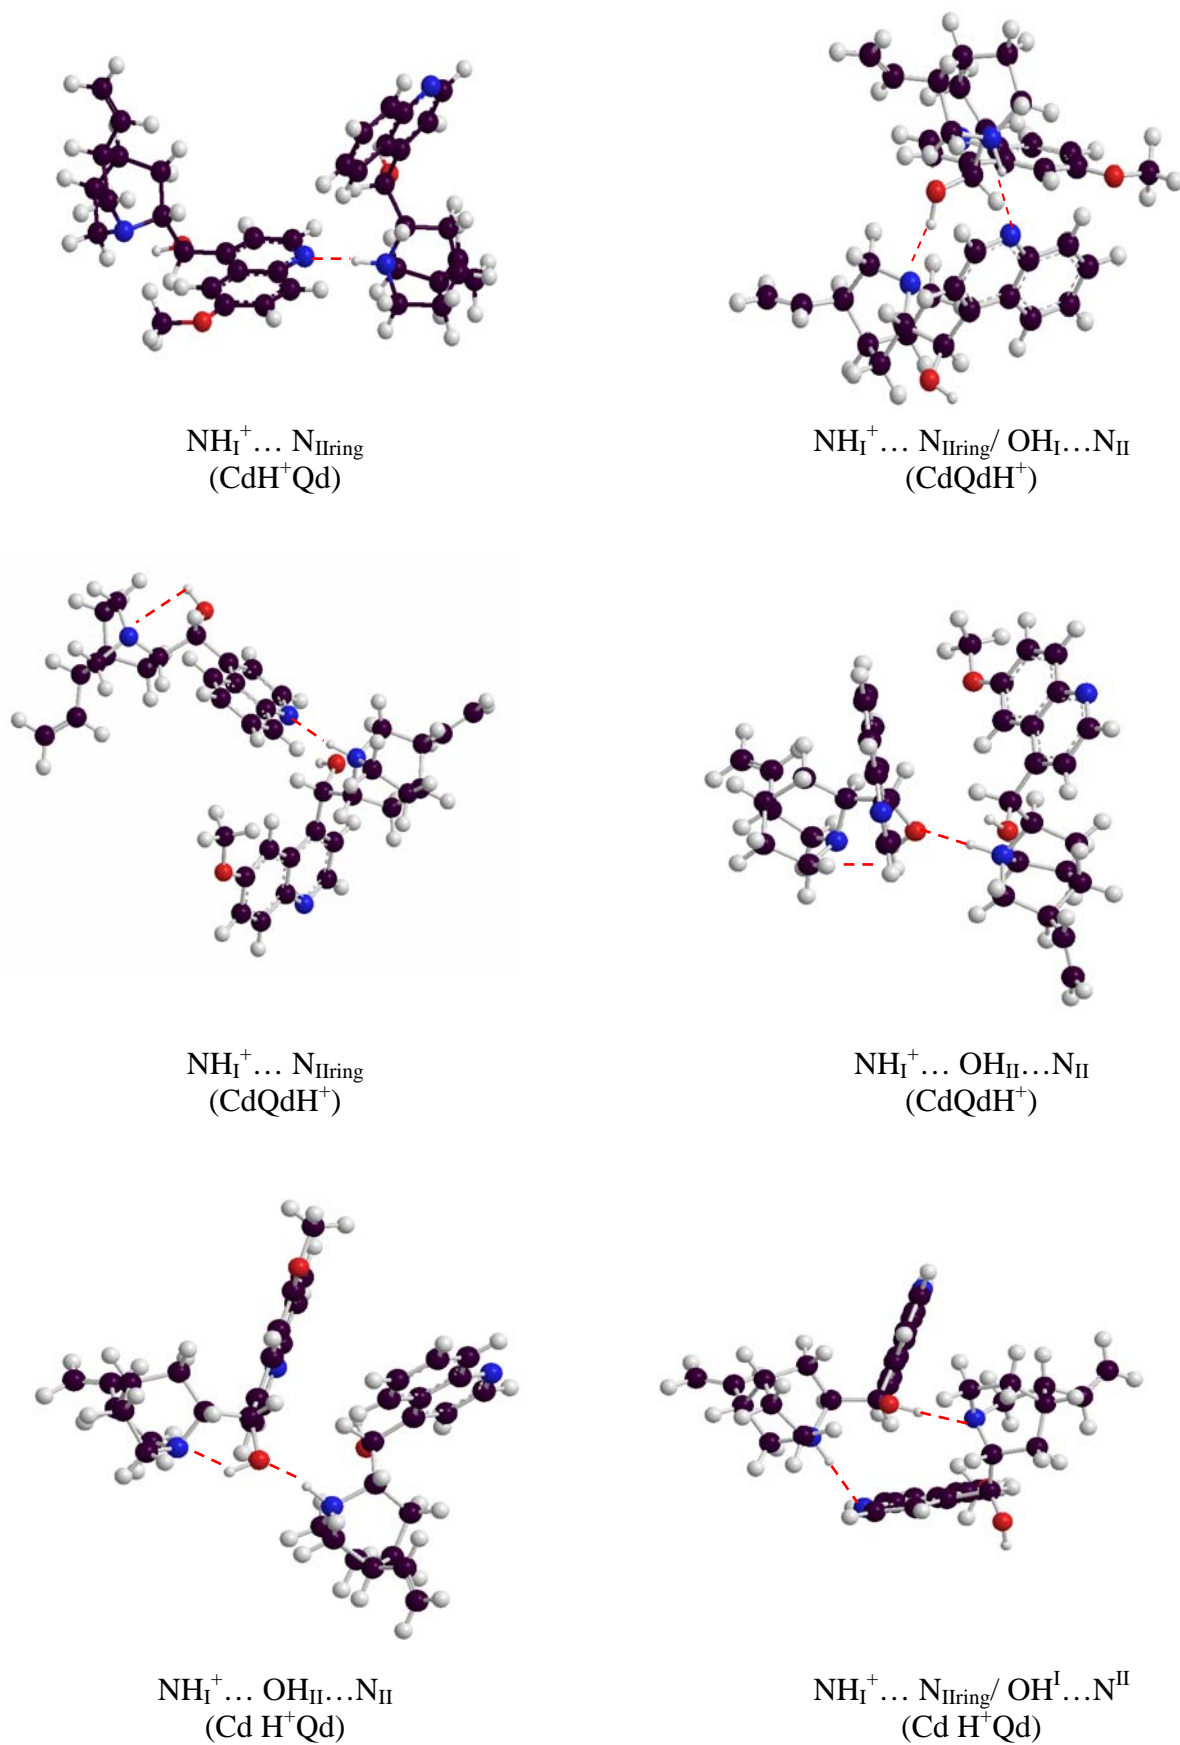

Figure S 5

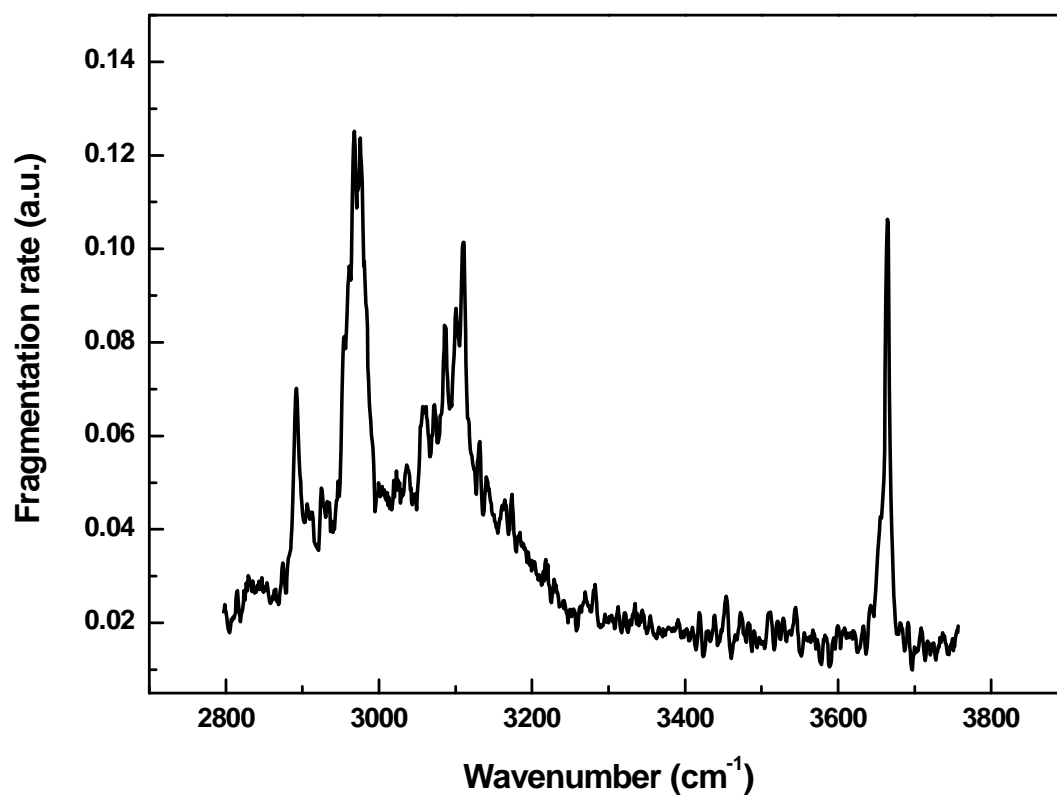

Supplement: c1cp20987f.pdf [file c1cp20987f.pdf]
